# Supplementary material for: Reduced Mo-doped NiCo2O4 with rich oxygen vacancies as an advanced electrode material in supercapacitors
Source: Royal Society of Chemistry journal article supplement (doi:10.1039/d2cc01215d), 2022-01-01
Supplement: d2cc01215d1.pdf [file d2cc01215d1.pdf]

Electronic Supplementary Information (ESI) for Chemical Communications

This journal is (c) The Royal Society of Chemistry 2022

# Reduced Mo-doped NiCo<sub>2</sub>O<sub>4</sub> with rich oxygen vacancies as advanced electrode material in supercapacitors

Chengchao Wang, Xingyue Wu, Yong Qin and Yong Kong\*

Jiangsu Key Laboratory of Advanced Materials and Technology, School of Petrochemical  
Engineering, Changzhou University, Changzhou 213164, China

Email address: [yzkongyong@cczu.edu.cn](mailto:yzkongyong@cczu.edu.cn)

## Experimental section

**Reagents and apparatus.** Nickel nitrate hexahydrate ( $\text{Ni}(\text{NO}_3)_2 \cdot 6\text{H}_2\text{O}$ ), cobalt nitrate hexahydrate ( $\text{Co}(\text{NO}_3)_2 \cdot 6\text{H}_2\text{O}$ ), sodium borohydride ( $\text{NaBH}_4$ ), potassium hydroxide ( $\text{KOH}$ ) and anhydrous alcohol were purchased from Sinopharm Chemical Reagent Co., Ltd. (Shanghai, China). Sodium molybdate dihydrate ( $\text{Na}_2\text{MoO}_4 \cdot 2\text{H}_2\text{O}$ ) was obtained from Aladdin Chemistry Co., Ltd. (Shanghai, China). Urea was received from Shanghai Macklin Biochemical Technology Co., Ltd. (Shanghai, China). All aqueous solutions were prepared with ultrapure water ( $18.2 \text{ M}\Omega \cdot \text{cm}$ , Millipore).

Scanning electron microscopy (SEM) and transmission electron microscopy (TEM) characterizations were conducted with a Supra55 field-emission scanning electron microscope (Zeiss, Germany) and a JEM 2100 transmission electron microscope (JEOL, Japan), respectively. The X-ray diffraction (XRD) patterns of different samples were recorded on a D/max 2500PC diffractometer (Rigaku, Japan). The  $\text{N}_2$  adsorption/desorption isotherms as well as the pore size distributions of different samples were determined by using an ASAP 2010 specific surface area and pore size analyzer (Micromeritics, USA). The X-ray photoelectron spectroscopy (XPS) of  $\text{NiCo}_2\text{O}_4$ ,  $\text{Mo-NiCo}_2\text{O}_4$  and  $\text{R-Mo-NiCo}_2\text{O}_4$  was conducted with an ESCALAB 250Xi X-ray photoelectron spectrometer (Thermo Fisher Scientific, USA). The electron paramagnetic resonance (EPR) spectra of  $\text{NiCo}_2\text{O}_4$ ,  $\text{Mo-NiCo}_2\text{O}_4$  and  $\text{R-Mo-NiCo}_2\text{O}_4$  were recorded by means of an EMXmicro EPR spectrometer (Bruker, Germany). The electrical conductivities of different samples were measured by a SZT-2A four-probe instrument purchased from Tongchuang Electronics Co., Ltd. (Suzhou, China). All electrochemical data including cyclic voltammograms (CVs), galvanostatic charge/discharge (GCD) curves and electrochemical impedance spectroscopy (EIS) were obtained on a CHI660D electrochemical workstation (Shanghai Chenhua Instruments Co. Ltd., China).

**Synthesis of Mo doped NiCo-LDH (Mo-NiCo-LDH).** The synthesis of NiCo-LDH has been reported previously,<sup>1</sup> and here Mo-NiCo-LDH was synthesized by the same method except for the addition of  $\text{Na}_2\text{MoO}_4 \cdot 2\text{H}_2\text{O}$  as the Mo source. In a typical procedure, 6 mmol of  $\text{Co}(\text{NO}_3)_2 \cdot 6\text{H}_2\text{O}$ , 3 mmol of  $\text{Ni}(\text{NO}_3)_2 \cdot 6\text{H}_2\text{O}$ , 18 mmol of urea and 0.3 mmol of  $\text{Na}_2\text{MoO}_4 \cdot 2\text{H}_2\text{O}$  were dissolved in the mixture of 60 mL anhydrous alcohol and 20 mL of water under sonication, which was then transferred into a 100 mL

Teflon-lined stainless-steel autoclave. The autoclave was sealed and maintained at 120 °C for 8 h. After that, the solvothermal products were washed with water and anhydrous alcohol for several times and dried at 60 °C for 12 h, and Mo-NiCo-LDH was obtained. For control experiments, NiCo-LDH was also synthesized by the same procedures without the addition of  $\text{Na}_2\text{MoO}_4 \cdot 2\text{H}_2\text{O}$ .

**Synthesis of Mo-doped  $\text{NiCo}_2\text{O}_4$  (Mo- $\text{NiCo}_2\text{O}_4$ ).** One hundred milligrams of the as-synthesized Mo-NiCo-LDH were placed into a crucible and calcined at 350 °C in an air atmosphere (oxidation) for 3 h in a muffle furnace, and Mo- $\text{NiCo}_2\text{O}_4$  was obtained. For control experiments,  $\text{NiCo}_2\text{O}_4$  was also synthesized by calcining NiCo-LDH under the same conditions.

**Synthesis of reduced Mo-doped  $\text{NiCo}_2\text{O}_4$  (R-Mo- $\text{NiCo}_2\text{O}_4$ ).** One hundred milligrams of the above Mo- $\text{NiCo}_2\text{O}_4$  was dispersed in 60 mL of 1.0 M  $\text{NaBH}_4$  solution under sonication. After 30 min of reduction at room temperature, the products (R-Mo- $\text{NiCo}_2\text{O}_4$ ) were centrifugally separated, washed with water and anhydrous alcohol for several times, and dried at 60 °C for 12 h. The production yield of the R-Mo- $\text{NiCo}_2\text{O}_4$  was calculated to be 46%.

**Electrochemical measurements.** All the electrochemical measurements were carried out in a conventional three-electrode cell consisting of a glassy carbon electrode (GCE, 3 mm in diameter) modified with different active materials as the working electrode, a platinum plate (10 × 5 mm) as the counter electrode and a KCl saturated calomel electrode (SCE) as the reference electrode. The electrolyte used in these electrochemical measurements was 2.0 M KOH solution. The working electrode was constructed by dropping 10  $\mu\text{L}$  of the dispersion of different active materials (2 mg  $\text{mL}^{-1}$ ) onto the surface of the GCE (loading capacity: 284  $\mu\text{g cm}^{-2}$ ) and dried in ambient air. The thickness of the active materials on the GCE surface was measured to be ~0.02 mm.

The CVs were acquired over the potential range between 0 and 0.5 V, and the GCD curves were recorded over the potential range between -0.2 and 0.4 V. The cyclic stability was investigated by repeating the GCD testing at a current density of 10 A  $\text{g}^{-1}$ . The EIS of different active materials was collected in the frequency range from  $10^5$  to 0.01 Hz at an open circuit potential of 0.1 V, and the equivalent circuit was simulated by the ZSimpWin software.

**Calculation of specific capacity.** The specific capacity of different active materials can be calculated from the GCD curves according to the following formula:  $C_m = \frac{I \times t}{m}$ , where  $C_m$  represents the specific capacity ( $\text{mAh g}^{-1}$ ),  $I$  represents the current (mA),  $t$  represents the discharge time (h), and  $m$  represents the mass of the active materials (g).<sup>2</sup>

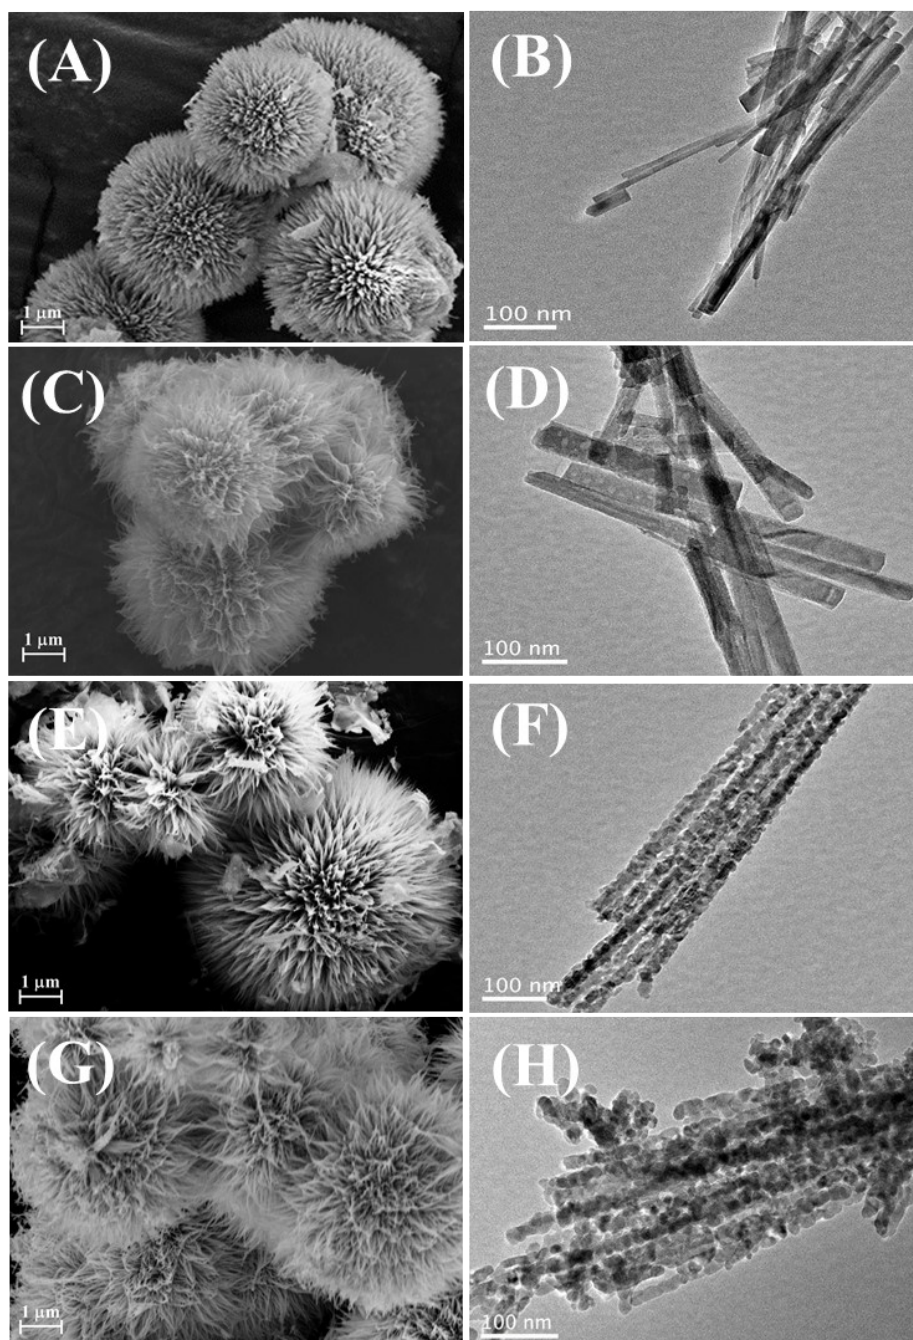

**Figure S1** SEM and TEM images of NiCo-LDH (A, B), Mo-NiCo-LDH (C, D), NiCo<sub>2</sub>O<sub>4</sub> (E, F) and Mo-NiCo<sub>2</sub>O<sub>4</sub> (G, H).

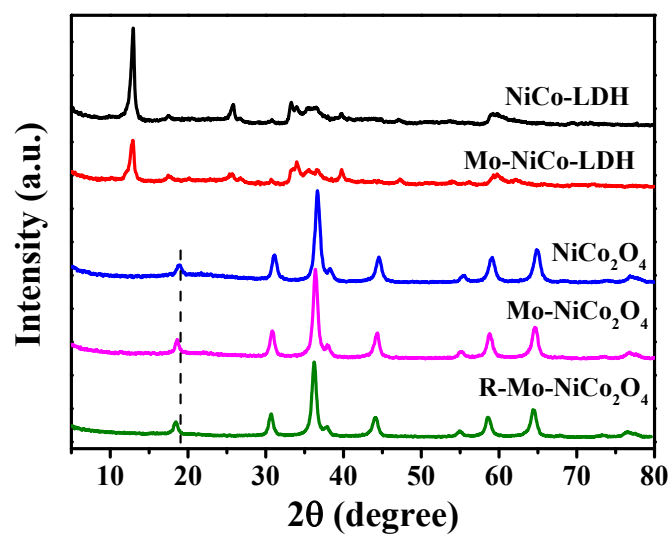

Figure S2 XRD patterns of NiCo-LDH, Mo-NiCo-LDH, NiCo<sub>2</sub>O<sub>4</sub>, Mo-NiCo<sub>2</sub>O<sub>4</sub> and R-Mo-NiCo<sub>2</sub>O<sub>4</sub>.

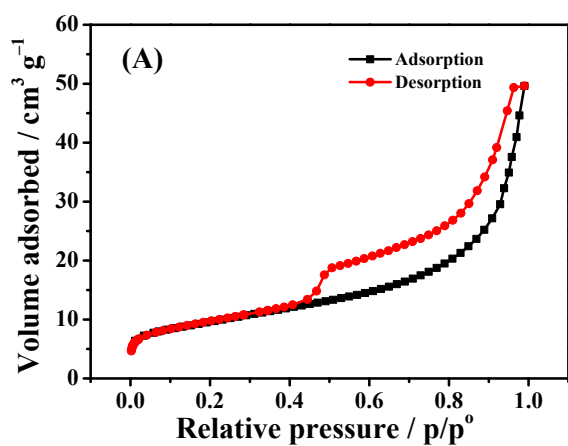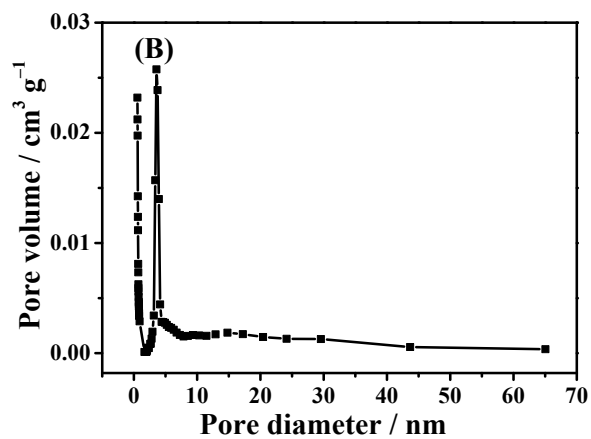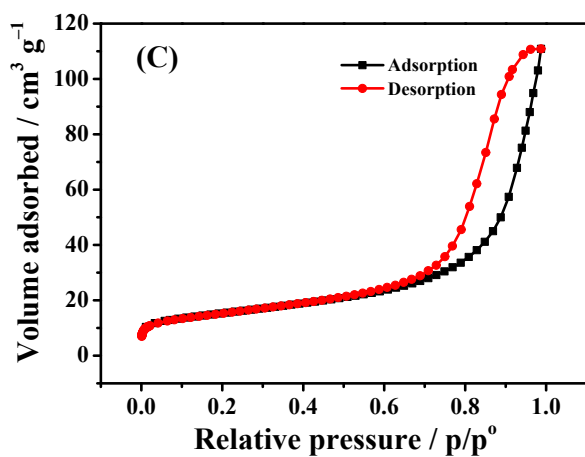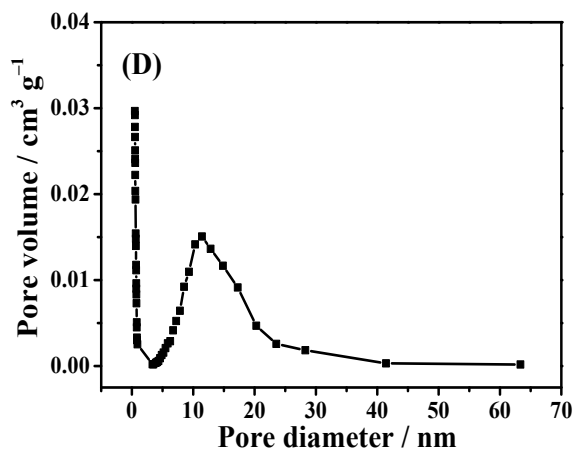

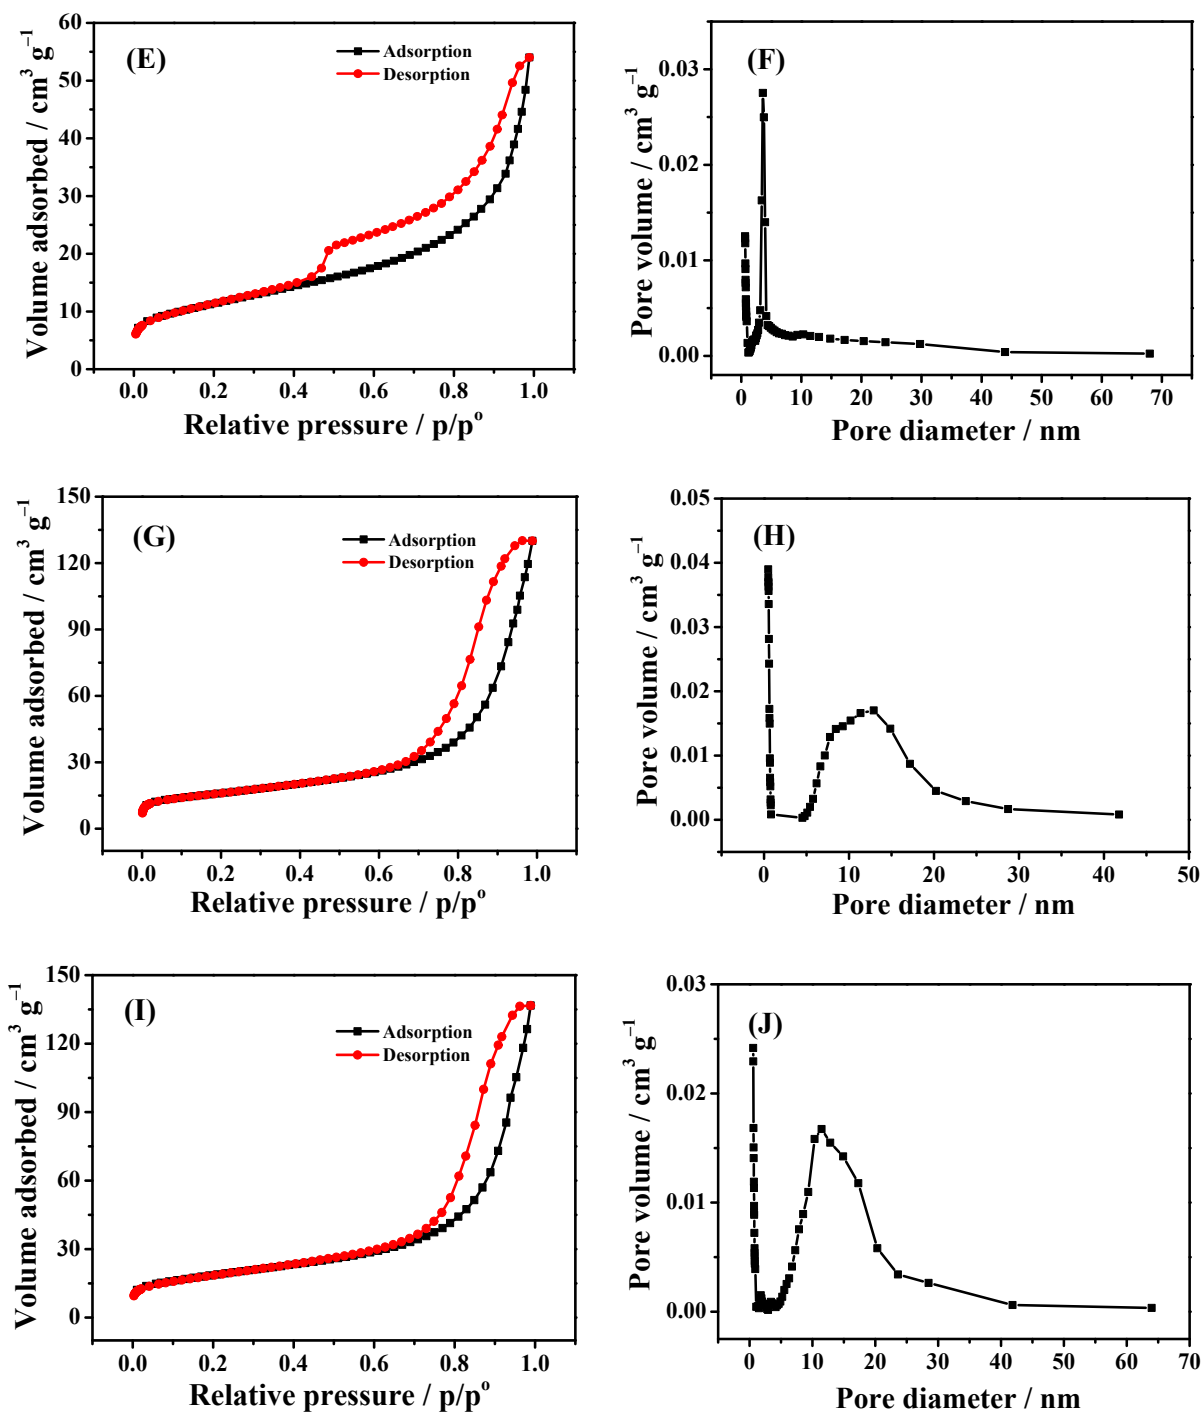

**Figure S3** N<sub>2</sub> adsorption/desorption isotherms and pore size distributions of NiCo-LDH (A, B), Mo-NiCo-LDH (C, D), NiCo<sub>2</sub>O<sub>4</sub> (E, F), Mo-NiCo<sub>2</sub>O<sub>4</sub> (G, H) and R-Mo-NiCo<sub>2</sub>O<sub>4</sub> (I, J).

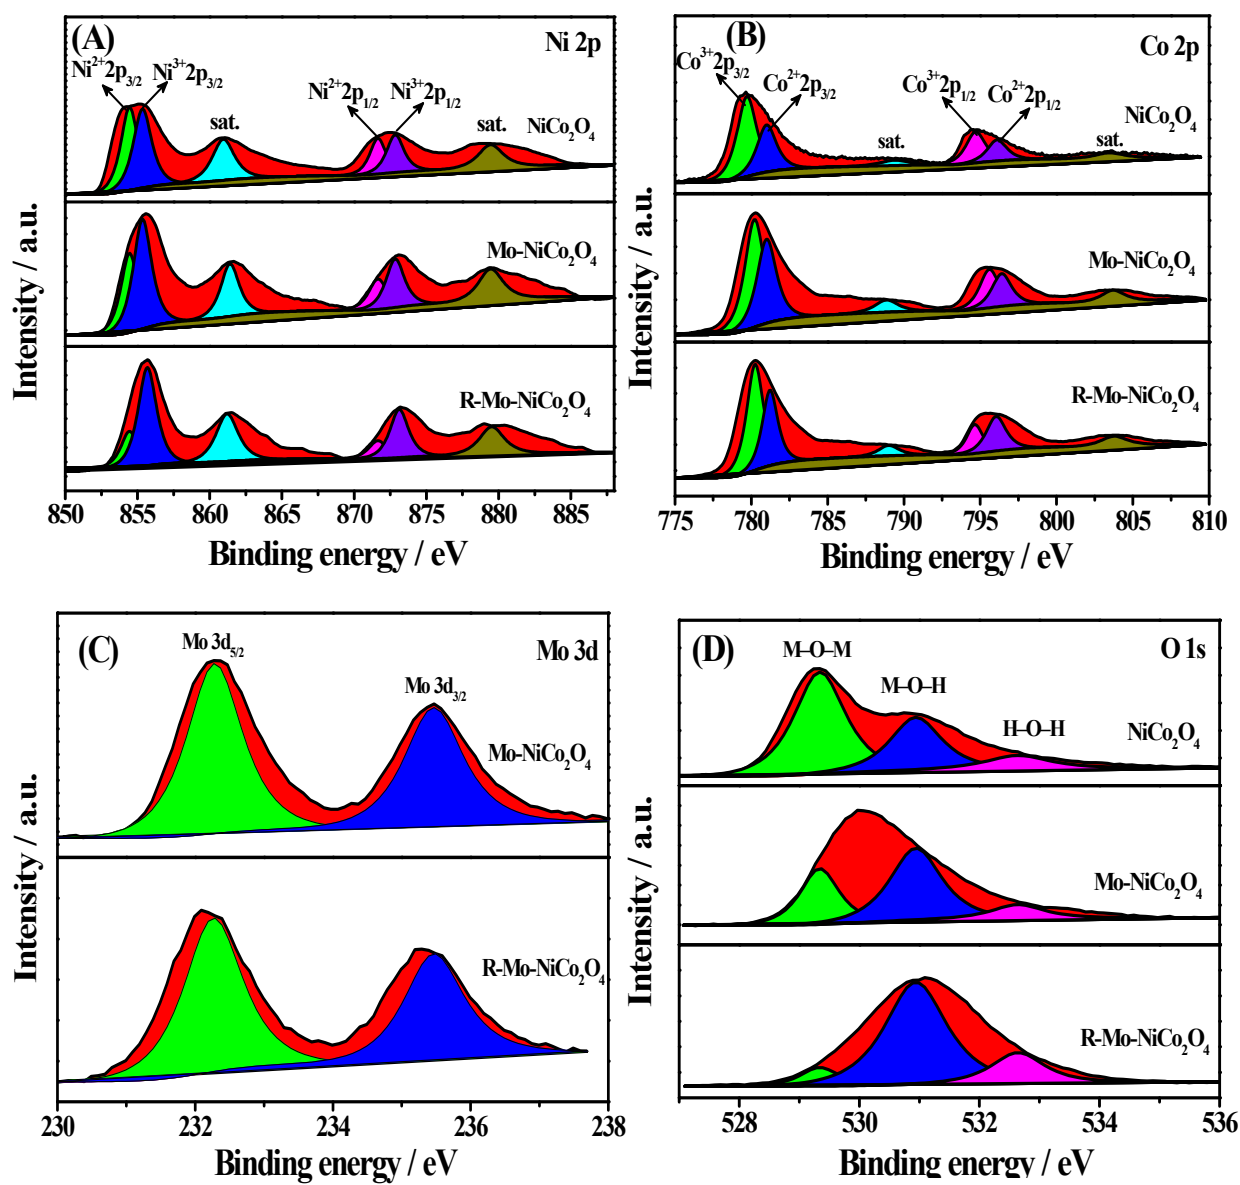

**Figure S4** High-resolution XPS spectra of Ni 2p (A), Co 2p (B), Mo 3d (C) and O 1s (D) of NiCo<sub>2</sub>O<sub>4</sub>, Mo-NiCo<sub>2</sub>O<sub>4</sub> and R-Mo-NiCo<sub>2</sub>O<sub>4</sub>.

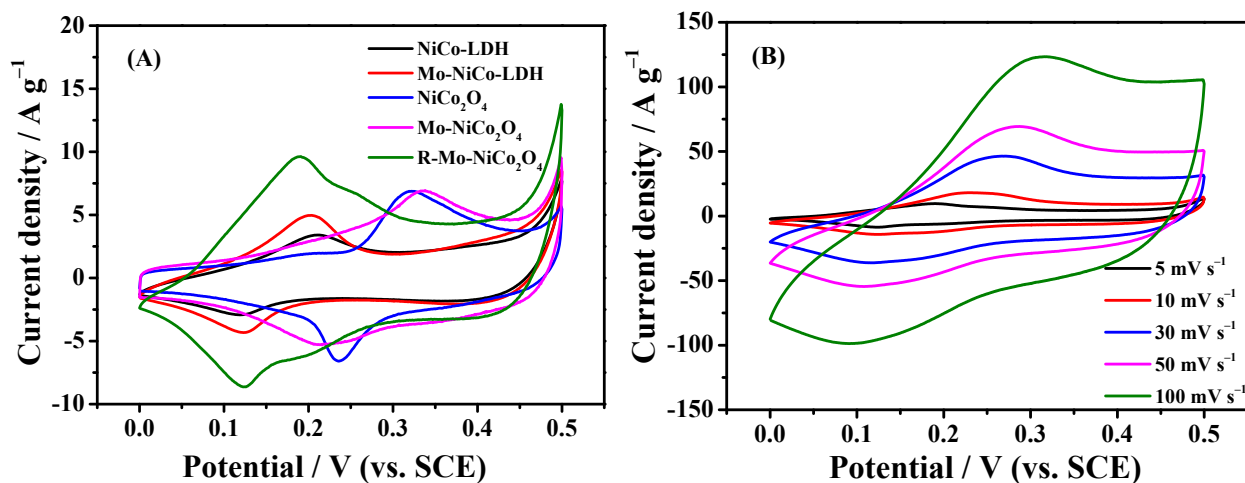

**Figure S5** (A) Cyclic voltammograms of GCE modified with different active materials in 2.0 M KOH at the scan rate of 5 mV s<sup>-1</sup>. (B) Cyclic voltammograms of R-Mo-NiCo<sub>2</sub>O<sub>4</sub> modified GCE in 2.0 M KOH at different scan rates.

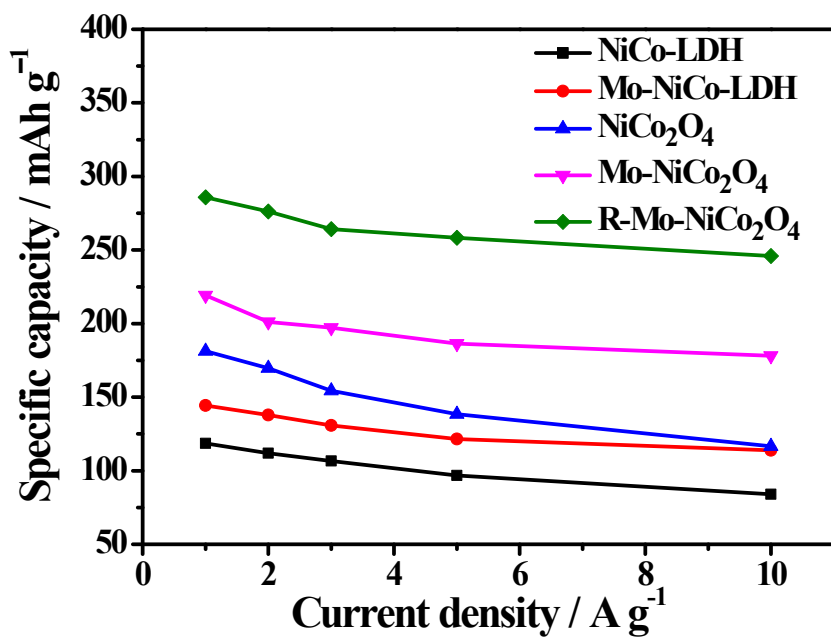

**Figure S6** Specific capacities of GCE modified with different active materials in 2.0 M KOH at different current densities.



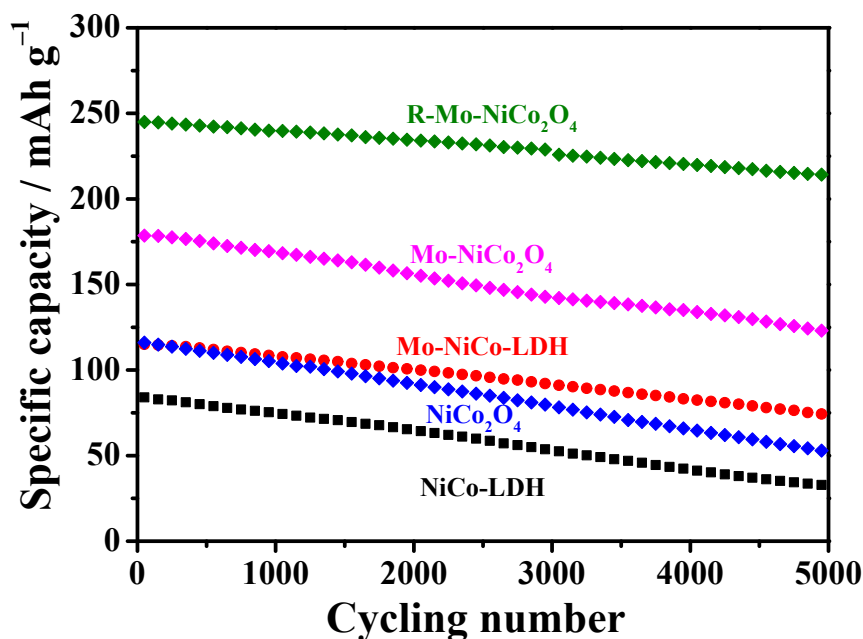

**Figure S7** Cyclic stability of GCE modified with different active materials in 2.0 M KOH at the current density of 10 A g<sup>-1</sup>.

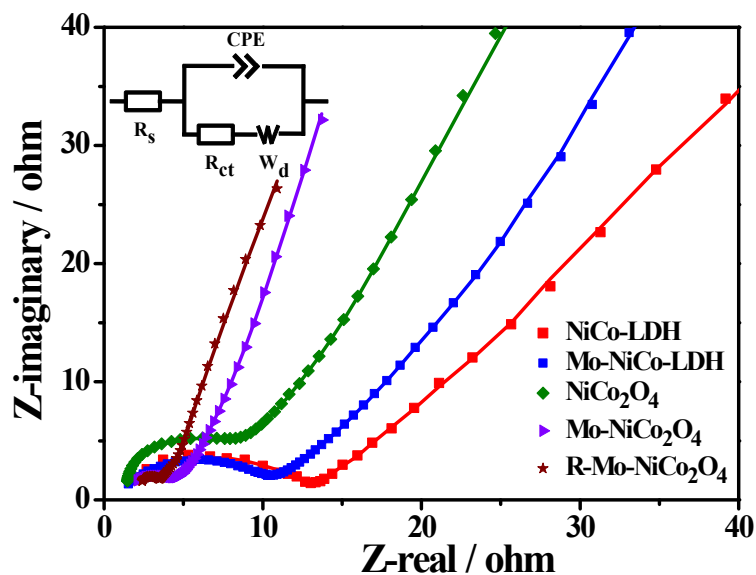

**Figure S8** Nyquist plots of GCE modified with different active materials in 2.0 M KOH. Inset is the corresponding equivalent circuit, where  $R_s$  represents the ohmic resistance of electrolyte and the internal resistance of electrode,  $R_{ct}$  represents the interfacial charge transfer resistance,  $W_d$  represents the Warburg resistance, and CPE represents the constant phase element.

**Table S1** Performance comparison with previous results at the current density of 1 A g<sup>-1</sup>.

| Sample                                | Capacity                  | Electrolyte | Reference |
|---------------------------------------|---------------------------|-------------|-----------|
| Co <sub>3</sub> O <sub>4</sub>        | 135.8 mAh g <sup>-1</sup> | 2 M KOH     | 3         |
| ZnCo <sub>2</sub> O <sub>4</sub>      | 78.9 mAh g <sup>-1</sup>  | 2 M KOH     | 4         |
| FeCo <sub>2</sub> O <sub>4</sub>      | 52.4 mAh g <sup>-1</sup>  | 1 M KOH     | 5         |
| Ce-NiMoO <sub>4</sub>                 | 107.0 mAh g <sup>-1</sup> | 1 M KOH     | 6         |
| R-Mo-NiCo <sub>2</sub> O <sub>4</sub> | 285.8 mAh g <sup>-1</sup> | 2 M KOH     | This work |

**Table S2** Electrical conductivities of different active materials.

| Active materials                      | Electrical conductivity (S cm <sup>-1</sup> ) |
|---------------------------------------|-----------------------------------------------|
| NiCo-LDH                              | 28.3                                          |
| Mo-NiCo-LDH                           | 68.4                                          |
| NiCo <sub>2</sub> O <sub>4</sub>      | 128.6                                         |
| Mo-NiCo <sub>2</sub> O <sub>4</sub>   | 386.7                                         |
| R-Mo-NiCo <sub>2</sub> O <sub>4</sub> | 1258.3                                        |

## References

- 1 H. Y. Liang, J. H. Lin, H. Jia, S. L. Chen, J. L. Qi, J. Cao, T. S. Lin, W. D. Fei and J. C. Feng, *J. Mater. Chem. A*, 2018, **6**, 15040.
- 2 C. C. Wang, W. G. Zheng, Z. Wang, Z. Z. Yin, Y. Qin and Y. Kong, *J. Electroanal. Chem.*, 2021, **901**, 115759.
- 3 S. H. Yang, Y. Y. Liu, Y. F. Hao, X. P. Yang, W. A. Goddard, X. L. Zhang and B. Q. Cao, *Adv. Sci.*, 2018, **5**, 1700659.
- 4 Y. Y. Shang, T. Xie, C. L. Ma, L. H. Su, Y. S. Gai, J. Liu and L. Y. Gong, *Electrochim. Acta*, 2018, **286**, 103.
- 5 X. Liu, F. X. Wei, Y. W. Sui, J. Q. Qi, Y. Z. He and Q. K. Meng, *J. Alloys Compd.*, 2018, **735**, 1339.
- 6 S. Z. Cui, F. Q. Wang, K. J. Sun, X. Wang, Q. Z. Hu, H. Peng, G. F. Ma and Z. Q. Lei, *J. Phys. Chem. C*, 2021, **125**, 18129.
